# Supplementary material for: Comparing the Influence of Surgical and Conservative Therapy on Quality of Life in Patients with Early-Stage Medication-Related Osteonecrosis of the Jaw—A Prospective Longitudinal Study
Source: MDPI journal article supplement (doi:10.3390/medicina59020277), 2023-01-31
Supplement: s1 [file s1]

**Table S1.** Comparison of the surgically and the non-surgically treated groups over the timepoints T0, T1, T2 and T3 with regard to OHIP 14 scores.

|                           |           | Surgical treatment |      | Non-surgical treatment |      | <i>p</i> -value for group difference, two-tailed |
|---------------------------|-----------|--------------------|------|------------------------|------|--------------------------------------------------|
|                           | Timepoint | Mean               | SD   | Mean                   | SD   |                                                  |
| Index score               | T0        | 14.1               | 11.6 | 17.1                   | 11.8 | 0.175                                            |
|                           | T1        | 11.1               | 11.5 | 11.6                   | 11.3 | 0.808                                            |
|                           | T2        | 8.9                | 11.5 | 8.1                    | 10.9 | 0.698                                            |
|                           | T3        | 6.7                | 10.7 | 4.4                    | 8.2  | 0.241                                            |
| Oral function             | T0        | 1.8                | 2.1  | 2.1                    | 2.2  | 0.419                                            |
|                           | T1        | 1.9                | 2.2  | 1.8                    | 2.1  | 0.914                                            |
|                           | T2        | 2.1                | 2.3  | 1.7                    | 1.9  | 0.449                                            |
|                           | T3        | 1.9                | 2.2  | 1.8                    | 1.9  | 0.917                                            |
| Orofacial pain            | T0        | 3.1                | 2.2  | 3.4                    | 2.3  | 0.535                                            |
|                           | T1        | 2.5                | 2.1  | 2.4                    | 2.0  | 0.759                                            |
|                           | T2        | 3.0                | 2.3  | 2.0                    | 1.9  | 0.085                                            |
|                           | T3        | 2.4                | 2.1  | 2.3                    | 1.9  | 0.854                                            |
| Orofacial appearance      | T0        | 3.2                | 2.2  | 3.4                    | 2.1  | 0.634                                            |
|                           | T1        | 2.7                | 2.0  | 2.5                    | 2.0  | 0.649                                            |
|                           | T2        | 2.6                | 2.3  | 2.3                    | 2.0  | 0.494                                            |
|                           | T3        | 2.5                | 2.2  | 2.7                    | 2.2  | 0.804                                            |
| Psychosocial impact score | T0        | 2.0                | 1.9  | 2.9                    | 2.0  | 0.016*                                           |
|                           | T1        | 1.8                | 1.9  | 2.3                    | 1.8  | 0.278                                            |
|                           | T2        | 2.0                | 1.9  | 2.2                    | 2.1  | 0.729                                            |
|                           | T3        | 1.8                | 1.6  | 1.4                    | 1.2  | 0.459                                            |

\**p* < 0.05. Equality of variance assumed, two-tailed T-test, SD: Standard deviation.

**Table S2.** Comparison of the surgically and the non-surgically treated group over the timepoints T0, T1, T2 and T3 with regard to QLQ-C30 scores.

\*  $p < 0.05$ . Equality of variance assumed, two-tailed T-test.

|                       |           | Surgical treatment |      | Non-surgical treatment |      | $p$ -value for group difference, -2-sided |
|-----------------------|-----------|--------------------|------|------------------------|------|-------------------------------------------|
|                       | Timepoint | Mean               | SD   | Mean                   | SD   |                                           |
| Global health status  | T0        | 55.1               | 22.0 | 49.0                   | 21.7 | 0.159                                     |
|                       | T1        | 55.8               | 26.1 | 44.3                   | 23.1 | 0.036*                                    |
|                       | T2        | 50.5               | 25.6 | 40.6                   | 23.1 | 0.095                                     |
|                       | T3        | 58.6               | 17.5 | 46.5                   | 26.7 | 0.047*                                    |
| Functional scales     |           |                    |      |                        |      |                                           |
| Physical functioning  | T0        | 67.9               | 25.9 | 52.0                   | 26.2 | 0.002*                                    |
|                       | T1        | 66.8               | 27.5 | 48.0                   | 29.7 | 0.002*                                    |
|                       | T2        | 66.7               | 26.9 | 44.9                   | 29.2 | 0.001*                                    |
|                       | T3        | 65.1               | 25.3 | 58.2                   | 30.5 | 0.398                                     |
| Role functioning      | T0        | 61.9               | 33.9 | 39.1                   | 38.0 | 0.001*                                    |
|                       | T1        | 64.5               | 34.0 | 39.9                   | 35.5 | 0.001*                                    |
|                       | T2        | 57.7               | 33.2 | 37.7                   | 35.6 | 0.012*                                    |
|                       | T3        | 60.1               | 30.9 | 59.7                   | 37.9 | 0.966                                     |
| Emotional functioning | T0        | 62.9               | 26.5 | 57.3                   | 21.8 | 0.268                                     |
|                       | T1        | 70.8               | 25.7 | 57.8                   | 24.9 | 0.018*                                    |
|                       | T2        | 64.6               | 27.4 | 59.4                   | 27.1 | 0.417                                     |
|                       | T3        | 71.1               | 21.6 | 70.8                   | 24.2 | 0.965                                     |
| Cognitive functioning | T0        | 80.3               | 23.5 | 74.0                   | 24.7 | 0.178                                     |
|                       | T1        | 80.4               | 23.8 | 67.3                   | 31.9 | 0.017*                                    |
|                       | T2        | 76.4               | 25.6 | 63.0                   | 26.1 | 0.028*                                    |
|                       | T3        | 79.5               | 23.1 | 72.2                   | 23.9 | 0.321                                     |
| Social functioning    | T0        | 65.6               | 32.2 | 62.0                   | 34.2 | 0.575                                     |
|                       | T1        | 72.5               | 31.9 | 52.4                   | 39.2 | 0.005*                                    |
|                       | T2        | 70.6               | 31.4 | 64.5                   | 38.0 | 0.428                                     |
|                       | T3        | 72.8               | 25.6 | 75.0                   | 33.7 | 0.794                                     |
| Symptom scales        |           |                    |      |                        |      |                                           |
| Fatigue               | T0        | 46.5               | 28.2 | 59.4                   | 26.2 | 0.021*                                    |
|                       | T1        | 38.7               | 30.8 | 54.0                   | 27.0 | 0.018*                                    |
|                       | T2        | 47.5               | 30.4 | 53.6                   | 25.9 | 0.376                                     |
|                       | T3        | 44.8               | 25.4 | 37.0                   | 27.8 | 0.336                                     |
| Nausea and vomiting   | T0        | 8.8                | 16.1 | 15.1                   | 23.3 | 0.074                                     |
|                       | T1        | 9.8                | 24.6 | 8.9                    | 17.3 | 0.862                                     |
|                       | T2        | 7.5                | 17.3 | 14.5                   | 26.3 | 0.125                                     |
|                       | T3        | 7.2                | 13.6 | 2.8                    | 9.6  | 0.278                                     |
| Pain                  | T0        | 43.0               | 33.6 | 46.9                   | 35.5 | 0.569                                     |
|                       | T1        | 31.3               | 33.3 | 47.0                   | 37.4 | 0.032*                                    |
|                       | T2        | 41.0               | 32.9 | 44.2                   | 32.8 | 0.680                                     |
|                       | T3        | 40.3               | 31.1 | 27.8                   | 32.0 | 0.202                                     |
| Dyspnoea              | T0        | 30.4               | 31.7 | 34.4                   | 32.2 | 0.533                                     |
|                       | T1        | 26.0               | 32.2 | 33.3                   | 32.7 | 0.285                                     |

|                           |    |      |      |      |      |        |
|---------------------------|----|------|------|------|------|--------|
|                           | T2 | 30.8 | 33.8 | 42.4 | 29.4 | 0.140  |
|                           | T3 | 29.9 | 31.6 | 33.3 | 28.4 | 0.726  |
| Insomnia                  | T0 | 38.1 | 34.8 | 45.8 | 31.4 | 0.252  |
|                           | T1 | 33.3 | 32.2 | 45.7 | 32.2 | 0.077  |
|                           | T2 | 41.5 | 34.0 | 26.1 | 33.3 | 0.054  |
|                           | T3 | 38.7 | 32.9 | 30.6 | 30.0 | 0.424  |
| Appetite<br>loss          | T0 | 24.4 | 33.7 | 26.0 | 34.6 | 0.808  |
|                           | T1 | 16.2 | 27.1 | 32.1 | 36.8 | 0.011* |
|                           | T2 | 20.7 | 32.2 | 27.5 | 38.5 | 0.388  |
|                           | T3 | 18.8 | 25.9 | 27.8 | 37.2 | 0.306  |
| Constipation              | T0 | 16.8 | 30.2 | 27.1 | 77.8 | 0.238  |
|                           | T1 | 12.8 | 29.7 | 20.2 | 29.2 | 0.241  |
|                           | T2 | 18.3 | 32.3 | 20.3 | 29.7 | 0.791  |
|                           | T3 | 17.4 | 27.8 | 25.0 | 32.2 | 0.395  |
| Diarrhoea                 | T0 | 19.4 | 30.1 | 14.6 | 25.3 | 0.404  |
|                           | T1 | 13.5 | 24.9 | 6.0  | 20.4 | 0.143  |
|                           | T2 | 13.3 | 27.7 | 14.3 | 29.0 | 0.889  |
|                           | T3 | 11.4 | 21.4 | 13.9 | 26.4 | 0.726  |
| Financial<br>difficulties | T0 | 13.2 | 25.8 | 19.8 | 32.6 | 0.223  |
|                           | T1 | 12.3 | 25.6 | 26.2 | 35.6 | 0.021* |
|                           | T2 | 15.7 | 26.2 | 23.2 | 38.2 | 0.273  |
|                           | T3 | 17.4 | 26.2 | 12.1 | 16.8 | 0.520  |
